# Supplementary material for: A novel small molecule Enpp1 inhibitor improves tumor control following radiation therapy by targeting stromal Enpp1 expression
Source: Sci Rep. 2024 Dec 2;14:29913. doi: 10.1038/s41598-024-80677-8 (PMC11612208; doi:10.1038/s41598-024-80677-8)
Supplement: Supplementary file 1 — Supplementary Material 1 [file 41598_2024_80677_MOESM1_ESM.pdf]

## Supplemental Figure 1

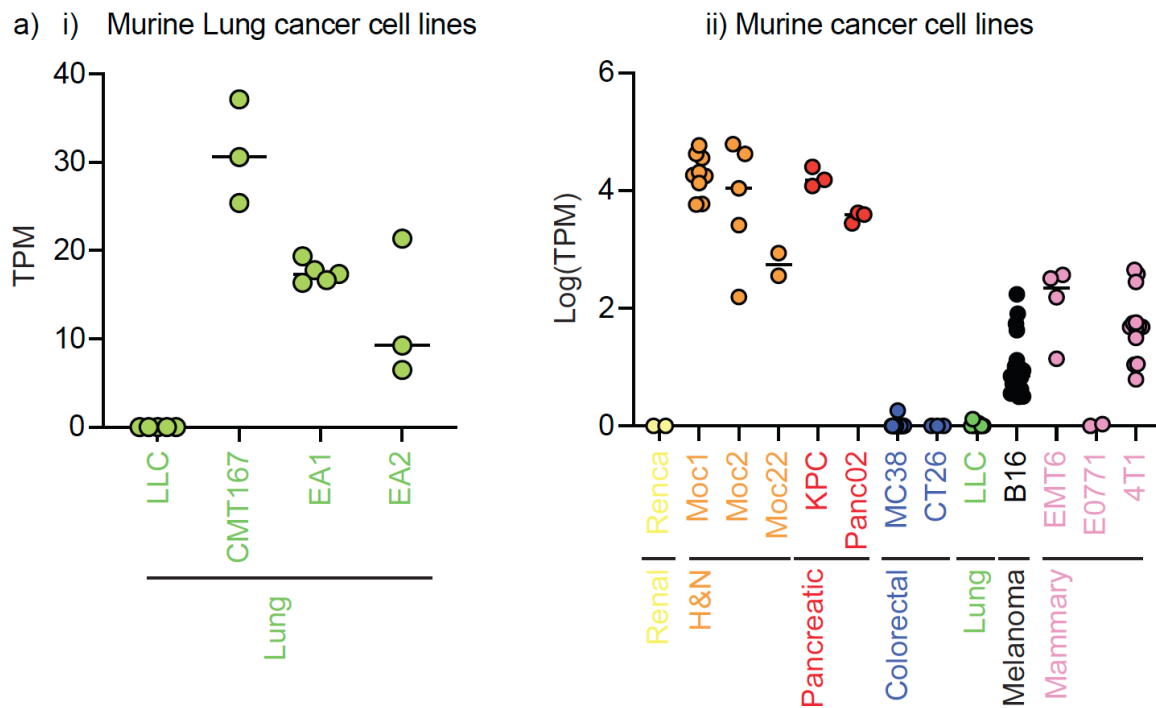

**Supplemental Figure 1.** a) i) Expression of *Enpp1* in murine lung cancer cell lines from GSE204918 and GSE100412. ii) Expression of *Enpp1* in control untreated murine cancer cell lines analyzed using TISMO. Cell lines are grouped and colored by cancer origin.

Supplemental Figure 2

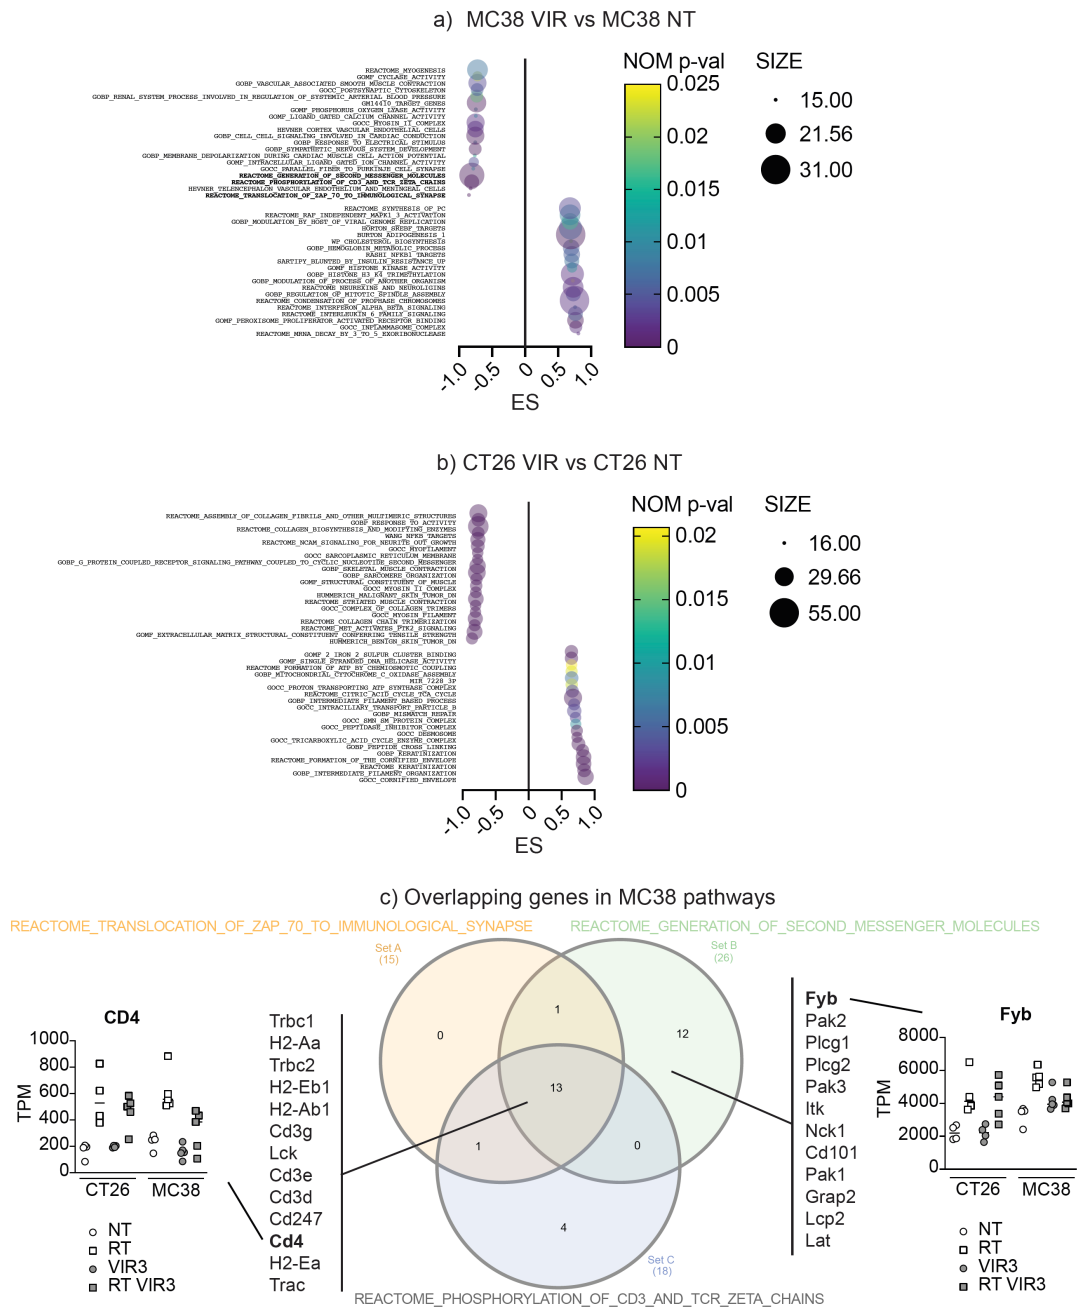

**Supplemental Figure 2.** GSEA results for NT vs VIR3 treatment in MC38 and CT26 tumors. Top 20 positive and negatively regulated pathways shown. Graph plots effect size on x-axis, nominal p-value in color scale, and the number of genes in the pathway is represented by the size of the circles. Potential immune-related pathways are highlighted in bold.

Supplemental Figure 3

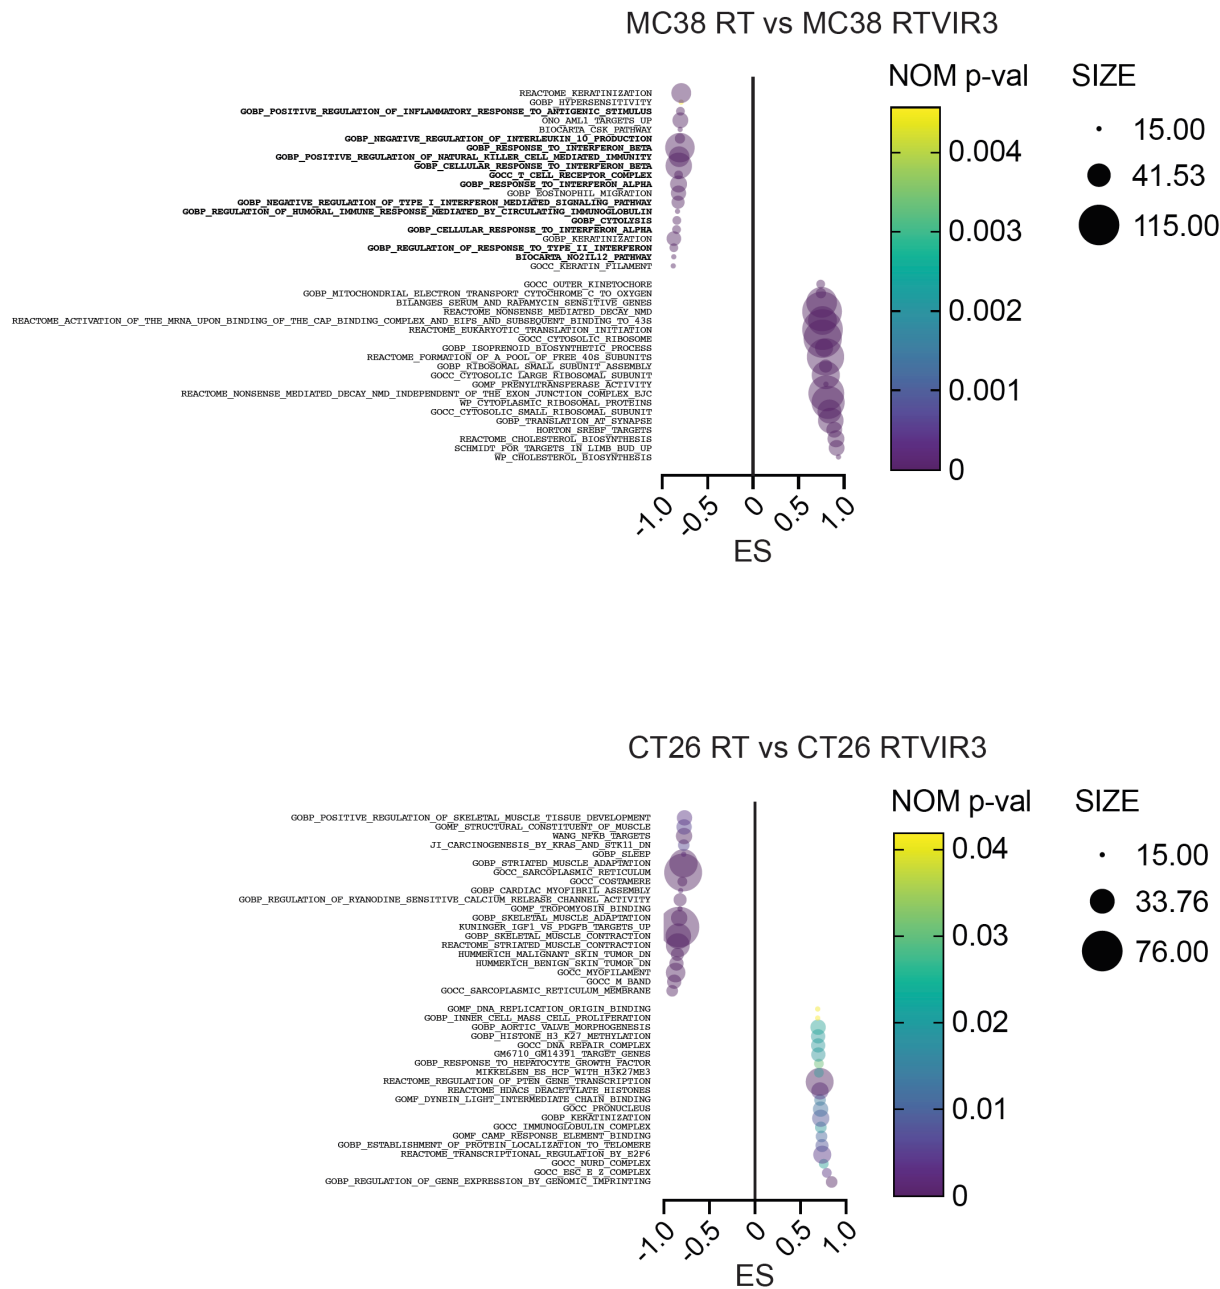

**Supplemental Figure 3.** GSEA results for RT vs RT+VIR3 treatment in MC38 and CT26 tumors. Top 20 positive and negatively regulated pathways shown. Graph plots effect size on x-axis, nominal p-value in color scale, and the number of genes in the pathway is represented by the size of the circles. Potential immune-related pathways are highlighted in bold.

Supplemental Figure 4

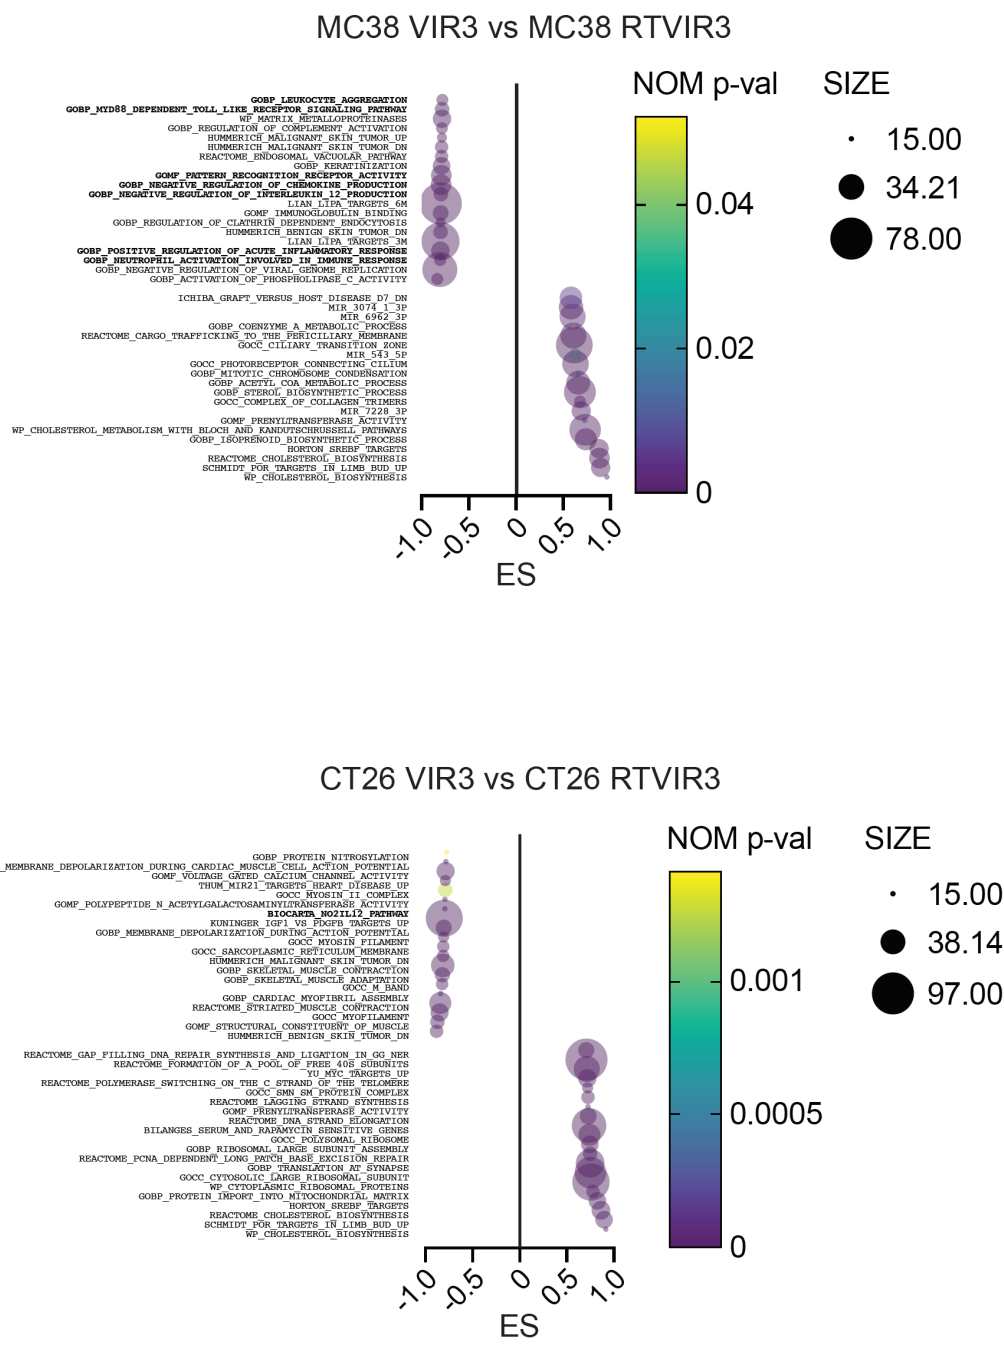

**Supplemental Figure 4.** GSEA results for VIR3 vs RT+VIR3 treatment in MC38 and CT26 tumors. Top 20 positive and negatively regulated pathways shown. Graph plots effect size on x-axis, nominal p-value in color scale, and the number of genes in the pathway is represented by the size of the circles. Potential immune-related pathways are highlighted in bold.

## Supplemental Figure 5

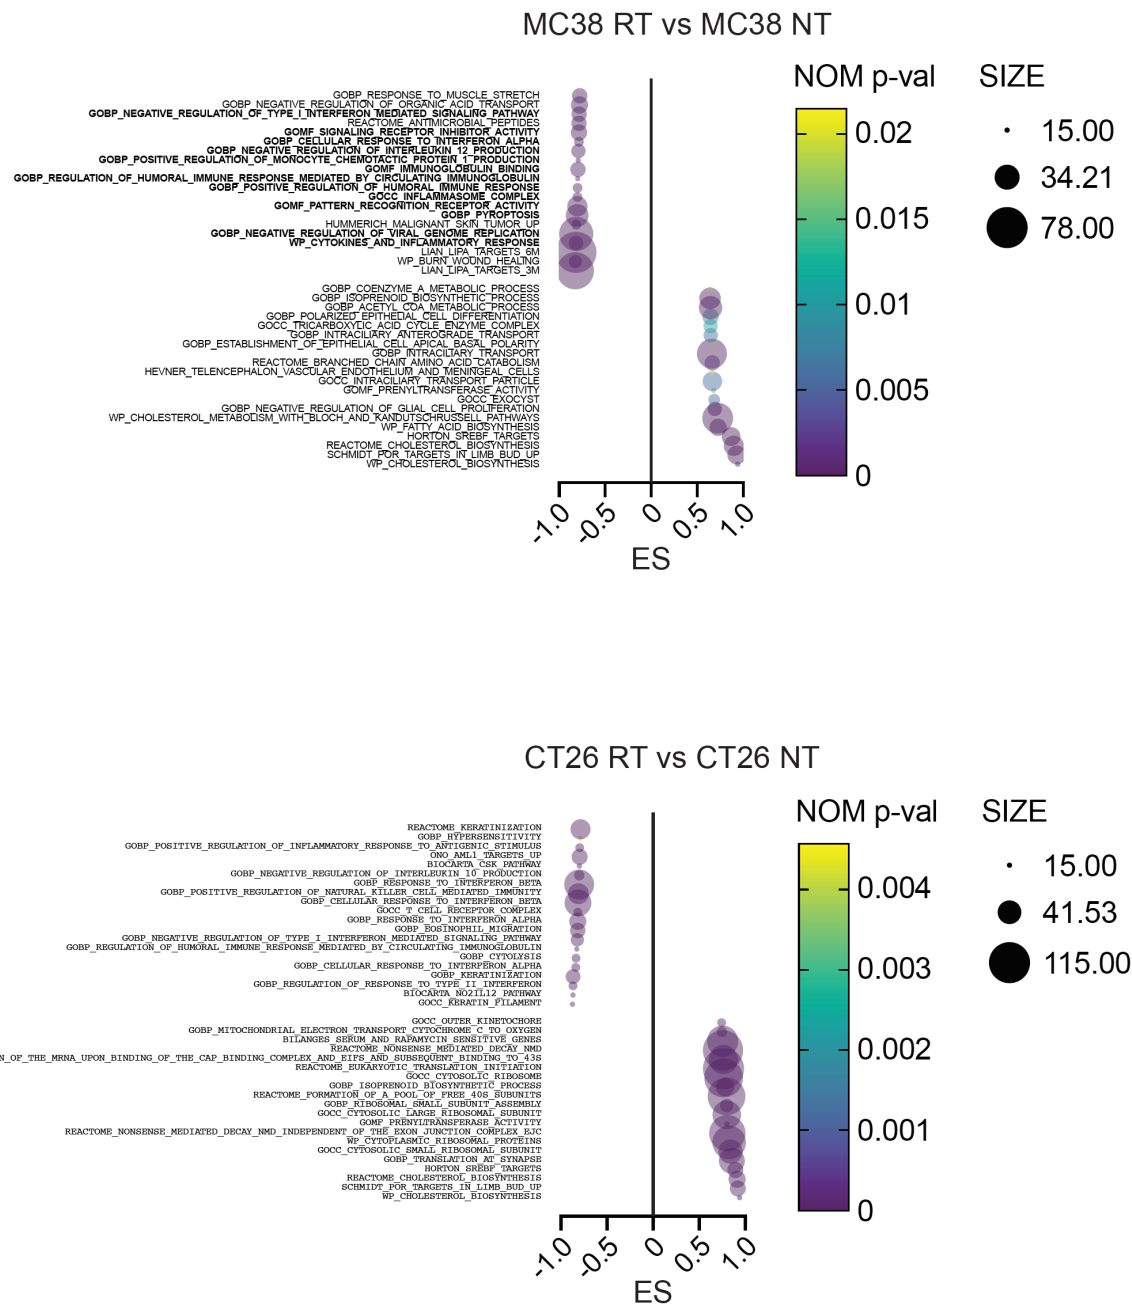

**Supplemental Figure 5.** GSEA results for NT vs RT treatment in MC38 and CT26 tumors. Top 20 positive and negatively regulated pathways shown. Graph plots effect size on x-axis, nominal p-value in color scale, and the number of genes in the pathway is represented by the size of the circles. Potential immune-related pathways are highlighted in bold.

**Supplemental Figure 6**

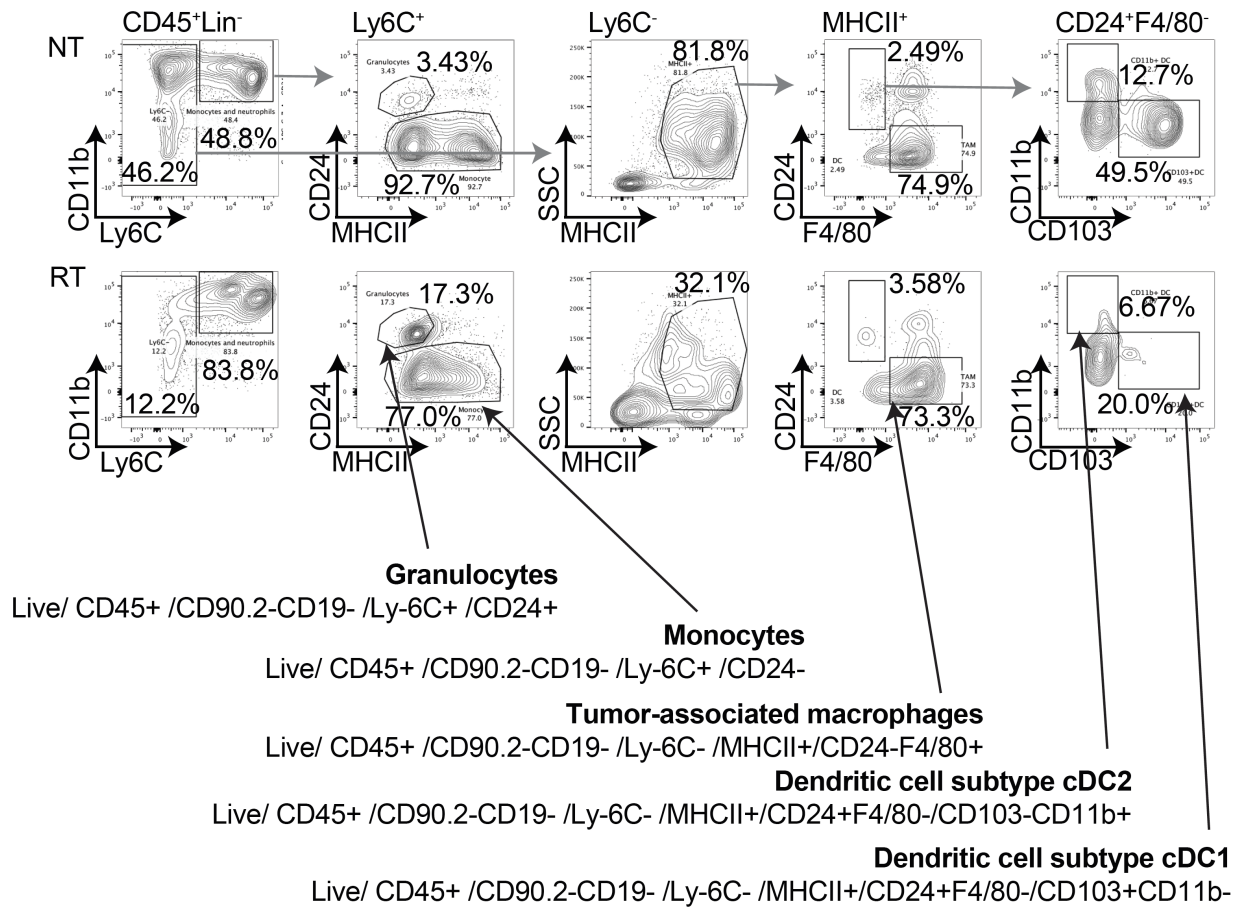

**Supplemental Figure 6.** Representative flow cytometry for myeloid cells infiltrating MC38 tumors that are untreated (NT – top) or irradiated at 12Gy (RT – bottom). Arrows (gray) show subgating to identify myeloid subtypes and (black) final populations for analysis.

**Supplemental Figure 7**

Enpp1

+/+ +/- -/-

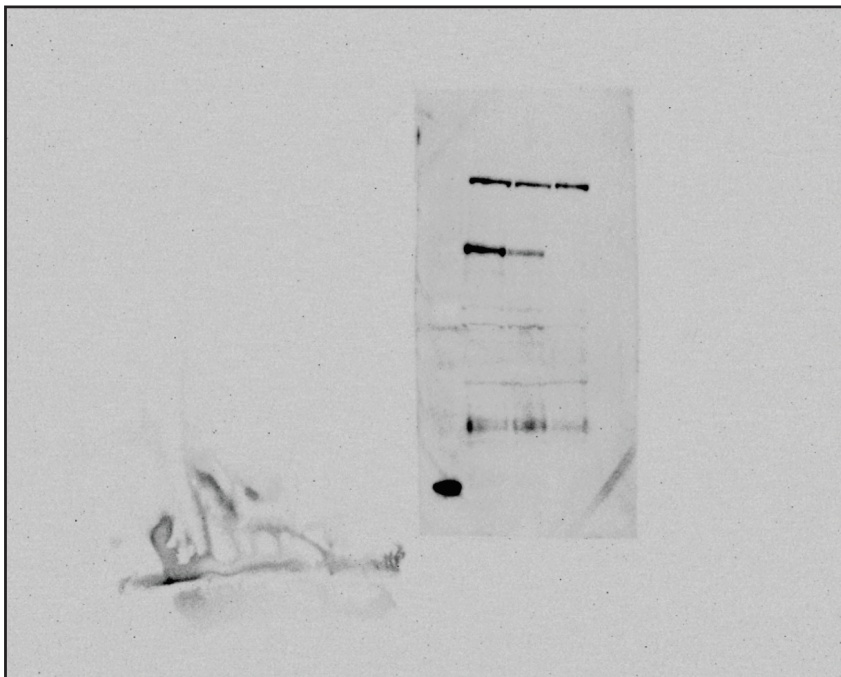

GAPDH

+/+ +/- -/-

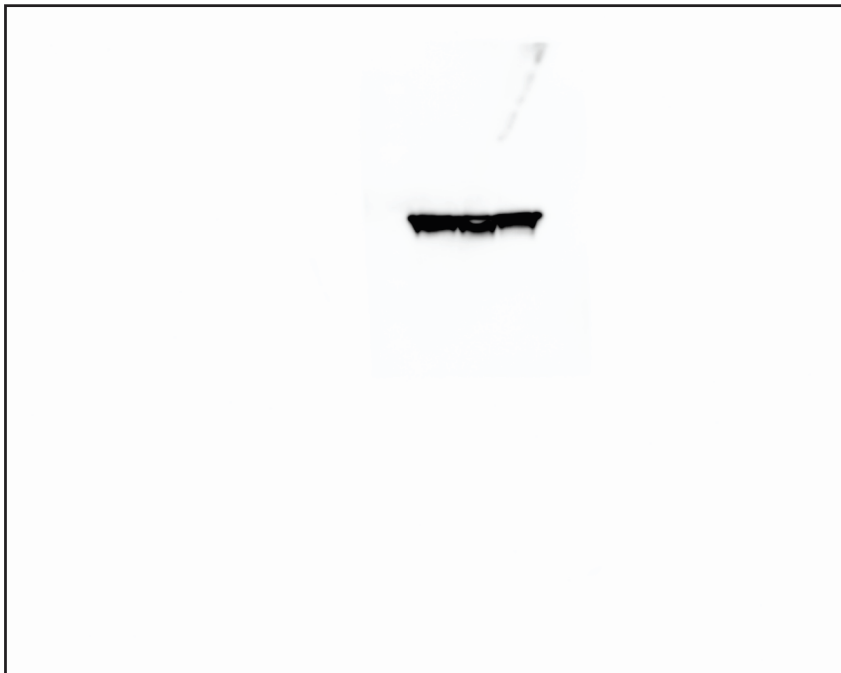

**Supplemental Figure 7.** Original uncropped western blots associated with Figure 3a.
